# Supplementary material
Source: publisher figshare collection journal article supplement (https://adisjournals.figshare.com/articles/dataset/_/24064806)
Supplement: Supplementary file 2 [file 1]

# The Impact of the COVID-19 Pandemic on Patients with Ulcerative Colitis: Results From a Global Ulcerative Colitis Narrative Patient Survey

Laurent Peyrin-Biroulet, Karoliina Ylänné, Allyson Sipes, Michelle Segovia, Sean Gardiner, Joseph C. Cappelleri, Amy Mulvey, Remo Panaccione

- The coronavirus disease 2019 (COVID-19) pandemic created challenges related to disease management for patients with ulcerative colitis (UC)
- The UC Narrative COVID-19 survey was conducted from August–December 2021 among adults with UC from the United States, Canada, Japan, France, and Finland
- Patients were questioned on disease management, health care access and experience, and preferences for interactions with their doctor

## Of 584 patients with UC who qualified for and completed the survey:

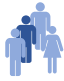

**25%** of patients experienced more flares during the pandemic vs 2019

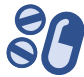

**88%** of patients taking prescription medication were very/somewhat satisfied with their current treatment plan

**53%** of patients were hesitant to make changes to their treatment plan during the pandemic

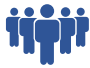

More patients relied on certain alternative support systems during the pandemic

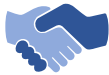

In-person appointments were preferred by:

- **68%** of patients when meeting a new doctor
- **55%** of patients when experiencing a flare
- **52%** of patients for regular check-ups

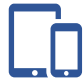

**41%** of patients preferred virtual appointments for UC prescription refills

## Factors affecting patients' control of UC symptoms during the COVID-19 pandemic

### a) Factors that made controlling the symptoms of UC easier

|                             |            |
|-----------------------------|------------|
| Having fewer social outings | <b>37%</b> |
| Working from home           | <b>29%</b> |
| Having a less busy schedule | <b>28%</b> |

### b) Factors that made controlling the symptoms of UC more difficult

|                                                                             |            |
|-----------------------------------------------------------------------------|------------|
| Having more anxiety/stress                                                  | <b>43%</b> |
| Being hesitant to go into a hospital or office to receive care or treatment | <b>34%</b> |

## Proportions of patients reporting satisfaction with overall quality of care received during in-person and virtual appointments during the COVID-19 pandemic

### In-person appointments

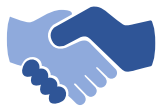

**Very/somewhat satisfied (total)**

**81%**

### Virtual appointments

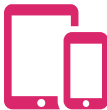

**Very/somewhat satisfied (total)**

**81%**

During the pandemic, most patients were satisfied with their current UC treatment plan and access to care; more patients relied on certain alternative UC management support systems, and many were impacted by anxiety/stress

The graphical abstract represents the opinions of the authors. For a full list of declarations, including funding and author disclosure statements, and copyright information, please see the full text online
